# Supplementary material
Source: PubMed Central journal article supplement (PMC9555873)
Supplement: NIHMS1802949-supplement-1.pdf [file NIHMS1802949-supplement-1.pdf]

| Training Set                      |                  |                  |               | Test Set |                  |                  |               |         |
|-----------------------------------|------------------|------------------|---------------|----------|------------------|------------------|---------------|---------|
| Variables                         | Overall (n = 66) | Control (n = 44) | ESCC (n = 22) | P value  | Overall (n = 28) | Control (n = 15) | ESCC (n = 13) | P value |
| Site                              |                  |                  |               |          |                  |                  |               |         |
| JHH                               | 49 (74%)         | 36 (82%)         | 13 (59%)      | 0.0907   | 5 (18%)          | 3 (20%)          | 2 (15%)       | >0.99   |
| Uganda                            | 17 (26%)         | 8 (18%)          | 9 (41%)       |          | 23 (82%)         | 12 (80%)         | 11 (85%)      |         |
| Age, Median (Interquartile Range) |                  |                  |               |          |                  |                  |               |         |
|                                   | 55 (48 – 66)     | 52 (39 – 64)     | 61 (54 – 70)  | 0.01     | 60 (48 – 68)     | 58 (44 – 68)     | 61 (54 – 66)  | 0.45    |
| Sex (%)                           |                  |                  |               |          |                  |                  |               |         |
|                                   |                  |                  |               | 0.79     |                  |                  |               | 0.48    |
| Female                            | 24 (36%)         | 17 (39%)         | 7 (32%)       |          | 13 (46%)         | 8 (53%)          | 5 (38%)       |         |
| Male                              | 42 (64%)         | 27 (61%)         | 15 (68%)      |          | 15 (54%)         | 7(47%)           | 8 (62%)       |         |
| Smoking (%)                       |                  |                  |               |          |                  |                  |               |         |
|                                   |                  |                  |               | 0.001    |                  |                  |               | 0.10    |
| Former                            | 12 (18%)         | 5 (11%)          | 7 (32%)       |          | 6 (21%)          | 1 (7%)           | 5 (38%)       |         |
| Current                           | 11 (17%)         | 7 (16%)          | 4 (18%)       |          | 4 (14%)          | 2 (13%)          | 2 (15%)       |         |
| None                              | 26 (39%)         | 24 (55%)         | 2 (9%)        |          | 18 (64%)         | 12 (80%)         | 6 (46%)       |         |
| Unknown                           | 17 (26%)         | 8 (18%)          | 9 (41%)       |          | 0 (0%)           | 0 (0%)           | 0 (0%)        |         |
| Alcohol Use (%)                   |                  |                  |               |          |                  |                  |               |         |
|                                   |                  |                  |               | 0.053    |                  |                  |               | 0.45    |
| Yes                               | 33 (50%)         | 25 (57%)         | 8 (36%)       |          | 9 (32%)          | 3 (20%)          | 6 (46%)       |         |
| No                                | 13 (20%)         | 10 (23%)         | 3 (14%)       |          | 19 (68%)         | 12 (80%)         | 7 (54%)       |         |
| Unknown                           | 20 (30%)         | 9 (20%)          | 11 (50%)      |          | 0 (0%)           | 0 (0%)           | 0 (0%)        |         |
| Race                              |                  |                  |               |          |                  |                  |               |         |
| White                             | 36 (55%)         | 26 (59%)         | 10 (45%)      |          | 4 (14%)          | 2 (13%)          | 2 (15%)       |         |
| Hispanic                          | 3 (5%)           | 3 (7%)           | 0 (0%)        |          | 0 (0%)           | 0 (0%)           | 0 (0%)        |         |
| Black                             | 25 (38%)         | 15 (34%)         | 10 (45%)      |          | 24 (86%)         | 13 (87%)         | 11(85%)       |         |
| Asian                             | 2 (3%)           | 0 (0%)           | 2 (9%)        |          | 0 (0%)           | 0 (0%)           | 0 (0%)        |         |
| ESCC Stage                        |                  |                  |               |          |                  |                  |               |         |
| 1 – 2                             | 7 (32%)          | N/A              | 7 (32%)       |          | 0 (0%)           | N/A              | 0 (0%)        |         |
| 3 – 4                             | 15 (68%)         | N/A              | 15 (68%)      |          | 13 (100%)        | N/A              | 13 (100%)     |         |
| Unknown                           | 0 (0%)           | N/A              | 0 (0%)        |          | 0 (0%)           | N/A              | 0 (0%)        |         |
